# Supplementary material
Source: MDPI journal article supplement (https://www.mdpi.com/2073-4433/12/4/519)
Supplement: s1 [file s1 › atmosphere-1157649-supplementary.pdf]

# Measurements of NO<sub>x</sub> and Development of Land Use Regression Models in an East-African City

Asmamaw Abera <sup>1</sup>, Ebba Malmqvist <sup>2</sup>, Yumjirmaa Mandakh <sup>2</sup>, Erin Flanagan <sup>2</sup>, Michael Jerrett <sup>3</sup>, Geremew Sahilu Gebrie <sup>4</sup>, Abebe Genetu Bayih <sup>5</sup>, Abraham Aseffa <sup>5</sup>, Christina Isaxon <sup>6</sup> and Kristoffer Mattisson <sup>2,\*</sup>

<sup>1</sup> Ethiopia Institute of Water Resources, Addis Ababa University, Addis Ababa P.O. Box 150461, Ethiopia. asmamaw.abera\_kebede.1677@design.lth.se

<sup>2</sup> Division of Occupational and Environmental Medicine, Lund University, Lund 22362, Sweden.

Ebba.malmqvist@med.lu.se (E.M.); yumjirmaa.mandakh@med.lu.se (Y.M.); erin.flanagan@med.lu.se (E.F.)

<sup>3</sup> Department of Environmental Health Sciences, Jonathan and Karin Fielding School of Public Health, University of California, Los Angeles, California 90095-1772, USA; mjerrett@ucla.edu

<sup>4</sup> School of Civil and Environmental Engineering, Addis Ababa Institute of Technology, Addis Ababa University, Addis Ababa P.O. Box 385, Ethiopia. geremew.sahilu@aau.edu.et

<sup>5</sup> Armauer Hansen Research Institute AHRI, Addis Ababa P.O. 1005, Ethiopia. abebe.genetu@ahri.gov.et (A.G.B.); aseffaa@gmail.com (A.A.)

<sup>6</sup> Institute of Design Sciences, Lund University, Lund 22362, Sweden. christina.isaxon@design.lth.se

\* Correspondence: Correspondence: kristoffer.mattisson@med.lu.se, Tel: +46732741430

**Table S1.** Number of datapoints (minutes of available data) from the Thermo 42i analyser at the Ethiopian Meteorological Institute site after applying inclusion and exclusion criteria.

| Diurnal trends |                      |        | Yearly concentrations |                       |
|----------------|----------------------|--------|-----------------------|-----------------------|
| Date           | Number of datapoints |        | Date                  | Number of datapoints* |
| 2018-05-07     | 1440                 |        | January 2017          | 1596                  |
| 2018-05-08     | 1440                 |        | February 2017         | 3529                  |
| 2018-05-09     | 1440                 |        | March 2017            | 3865                  |
| 2018-05-10     | 1440                 |        | April 2017            | 1722                  |
| 2018-05-11     | 1440                 |        | May 2017              | 1330                  |
| 2018-08-10     | 1440                 |        | June 2017             | 753                   |
| 2018-11-23     | 1440                 |        | July 2017             | 660                   |
| 2018-12-21     | 1440                 |        | November 2017         | 358                   |
| 2019-01-07     | 1440                 |        | March 2018            | 2771                  |
| 2019-01-21     | 1440                 |        | April 2018            | 1979                  |
| 2019-01-22     | 1440                 |        | May 2018              | 11,580                |
| 2019-01-23     | 1440                 |        | June 2018             | 2451                  |
| 2019-01-30     | 1440                 |        | July 2018             | 1133                  |
| Total          | 13 days              | 18,720 | August 2018           | 4058                  |
|                |                      |        | October 2018          | 3404                  |
|                |                      |        | November 2018         | 10,347                |
|                |                      |        | December 2018         | 20,496                |
|                |                      |        | January 2019          | 15,965                |
| Total          |                      |        | 103 days              | 87,997                |

\* Shows the total number of datapoints for all available days of the corresponding month.

**Table S2.** The partial  $R^2$  values, that is variance explained given the other variables in the model, for each variable included in the final  $\text{NO}_2$  model.

| <b>Variables included in the <math>\text{NO}_2</math> model</b> | <b>Partial <math>R^2</math></b> |
|-----------------------------------------------------------------|---------------------------------|
| Primary road distance in meters within 300 m                    | 0.284                           |
| Industrial area in $\text{m}^2$ within 3000 m                   | 0.193                           |
| Road distance in meters within 50 m                             | 0.037                           |

**Table S3.** The partial  $R^2$  values, that is variance explained given the other variables in the model, for each variable included in the final  $\text{NO}_x$  model.

| <b>Variables included in the <math>\text{NO}_x</math> model</b> | <b>Partial <math>R^2</math></b> |
|-----------------------------------------------------------------|---------------------------------|
| Primary road distance in meters within 300 m                    | 0.323                           |
| Industrial area in $\text{m}^2$ within 3000 m                   | 0.105                           |
| Road distance in meters within 50 m                             | 0.042                           |
